# Supplementary material for: Primary Trophoblast Cultures: Characterization of HLA Profiles and Immune Cell Interactions
Source: PubMed Central journal article supplement (PMC9136060; doi:10.3389/fimmu.2022.814019), 2022-05-13
Supplement: DataSheet_1.pdf [file DataSheet_1.pdf]

Supplementary Figure 1

A.

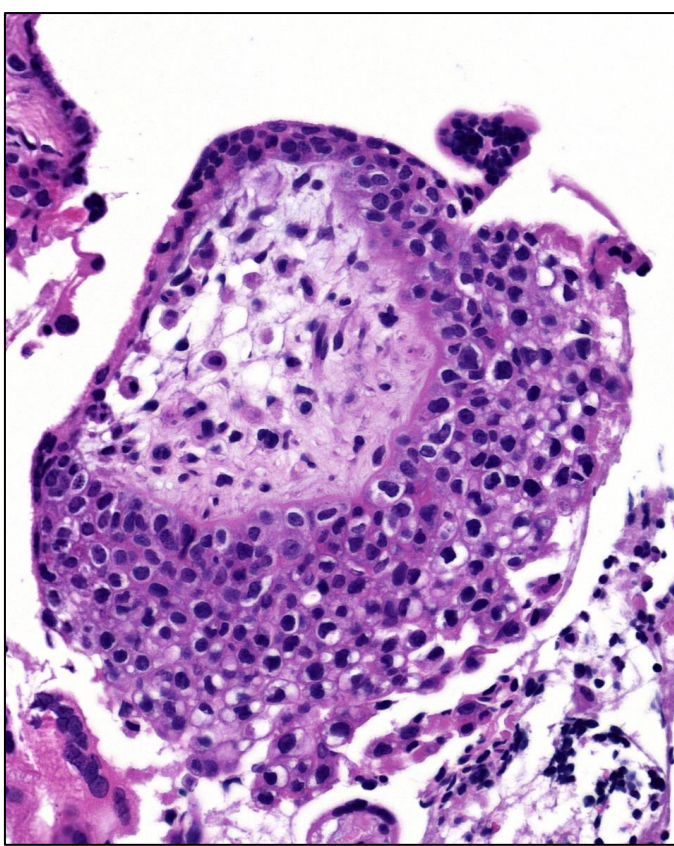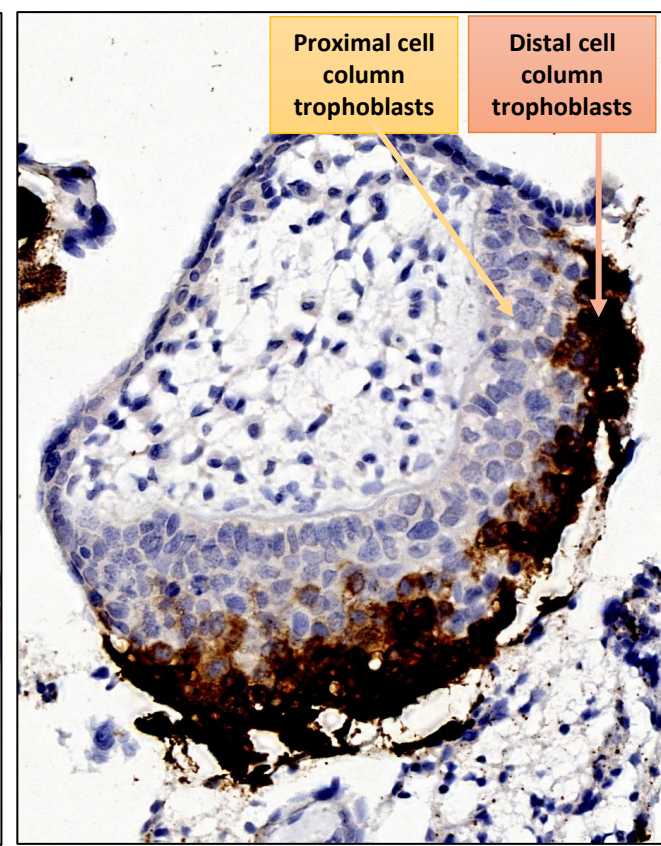

B.

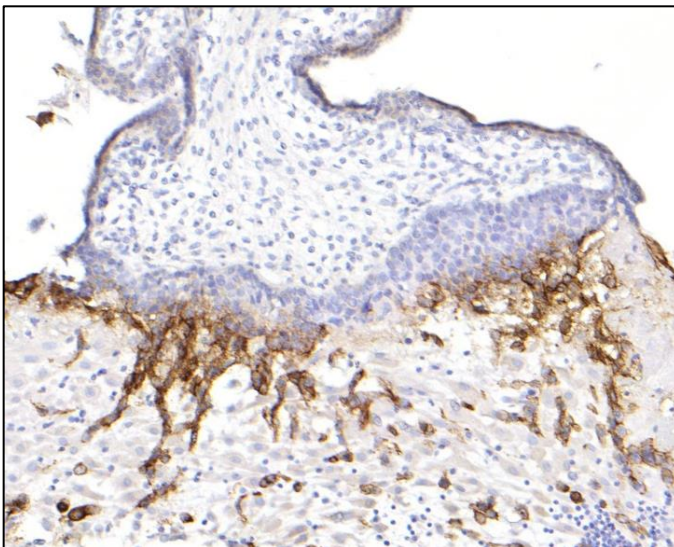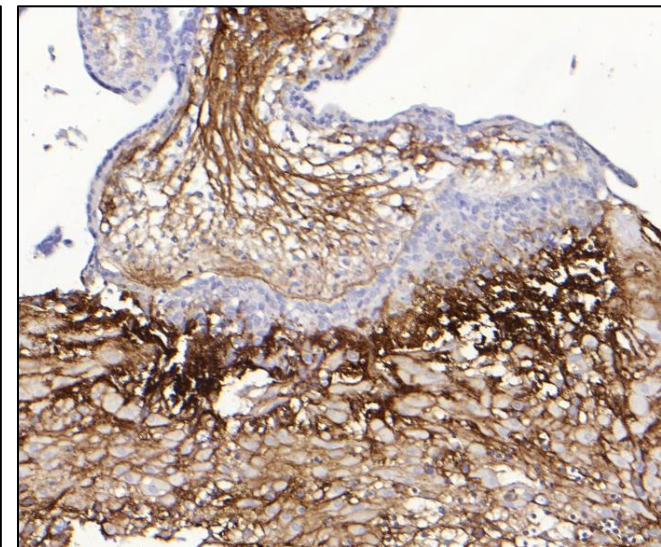

# Supplementary Figure 2

QH1

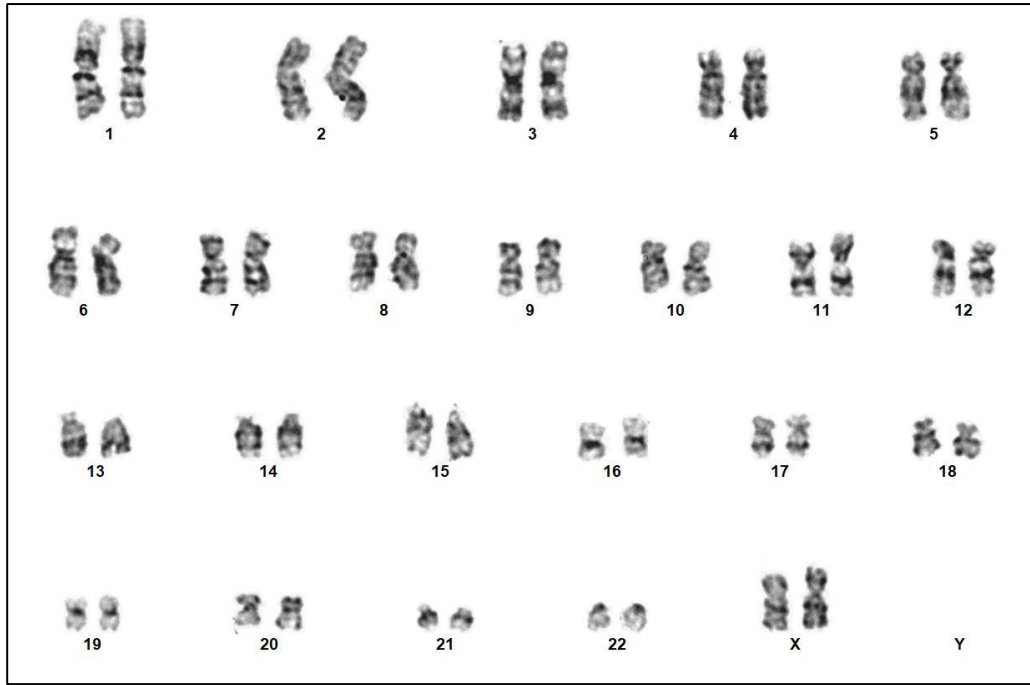

QG1

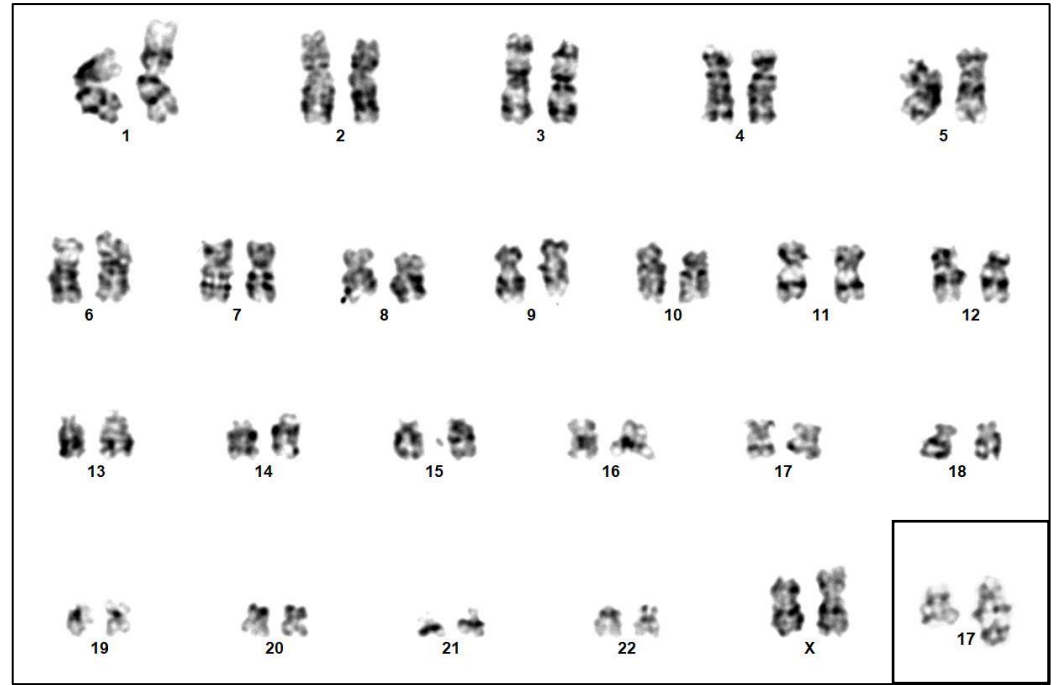

RC2

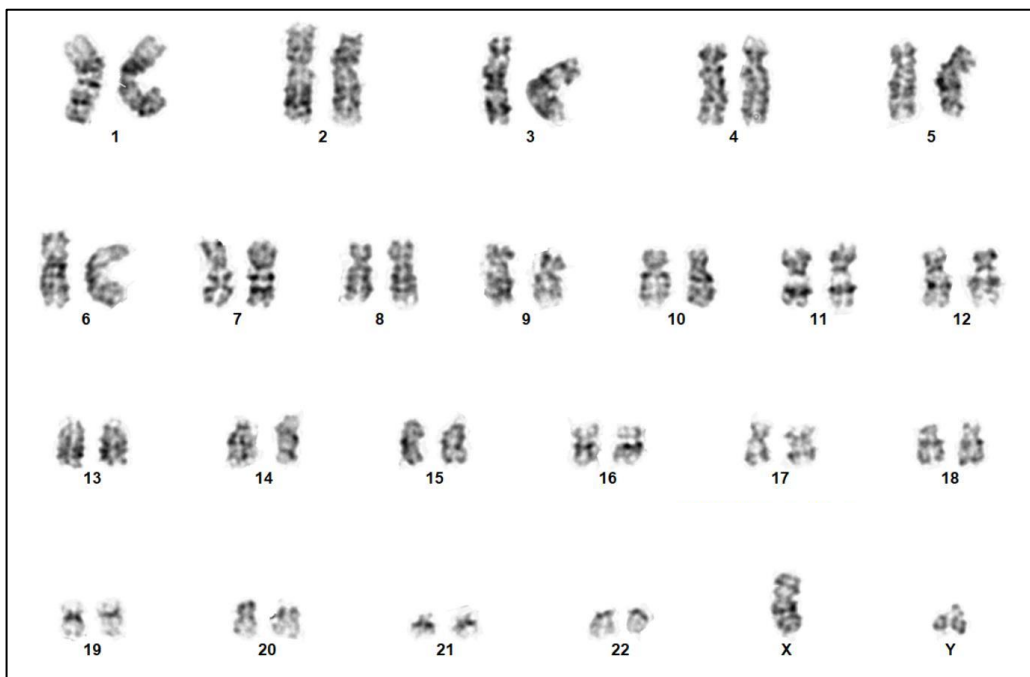

JAR

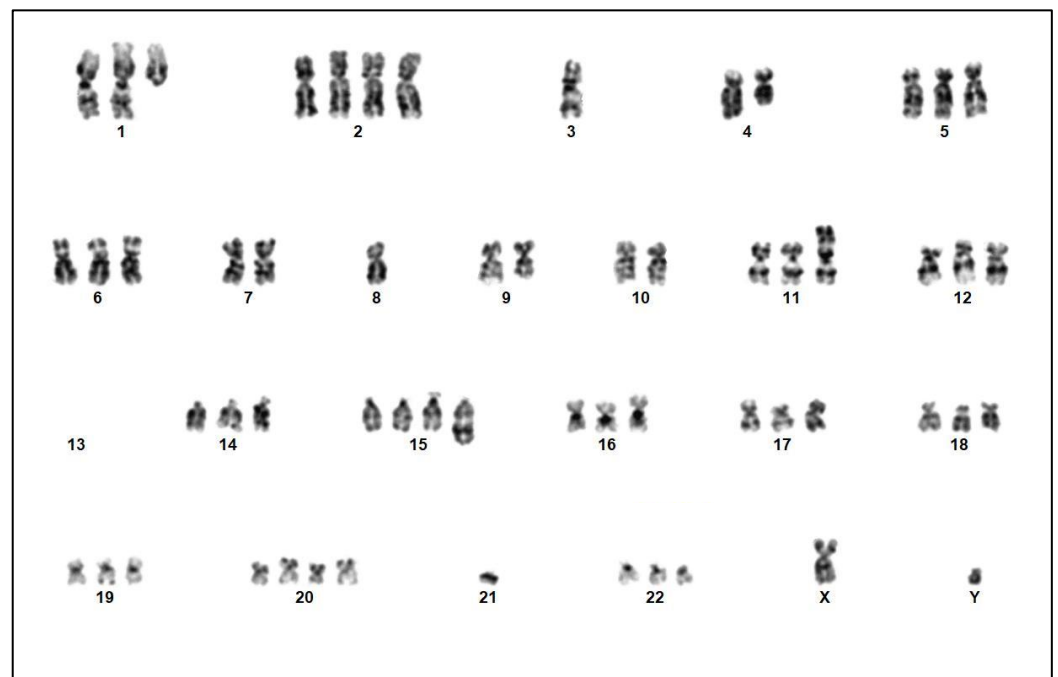

# Supplementary Figure 3a

**Mat. Blood #1**  
A1, A2, B8, B44(12)

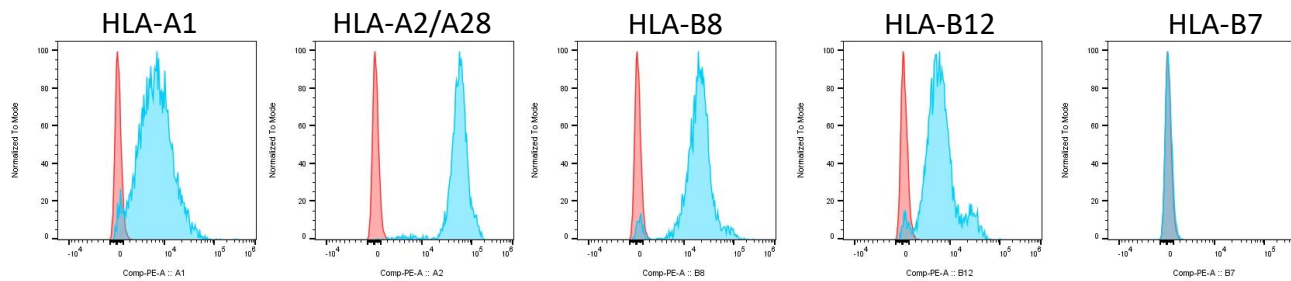

**Mat. Blood #2**  
A2, B7, B45(12)

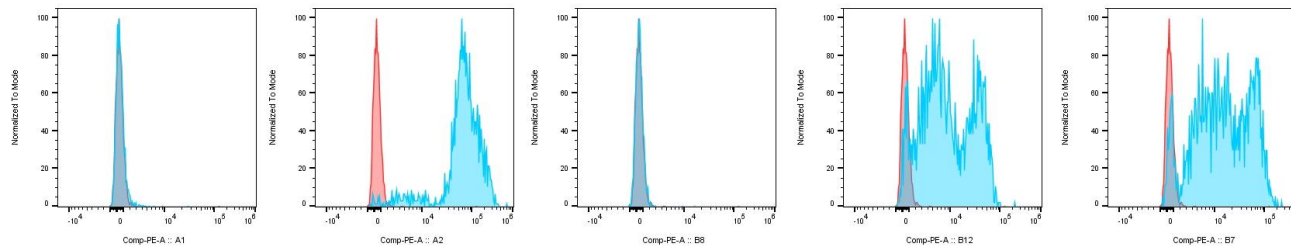

**Mat. Blood #3**  
A3, A68(28), B7, B44(12)

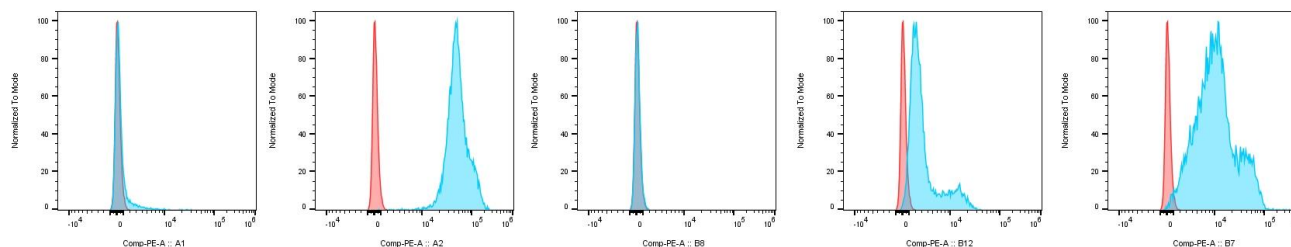

**Mat. Blood #4**  
A3, A32(19), B7

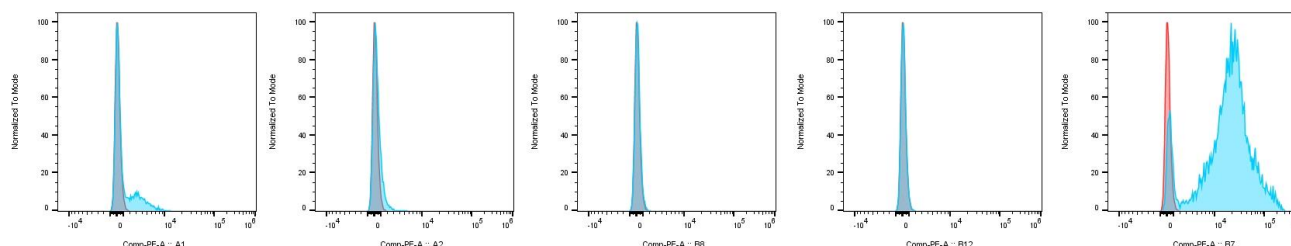

**Maternal DSC**  
A3, B7, B8

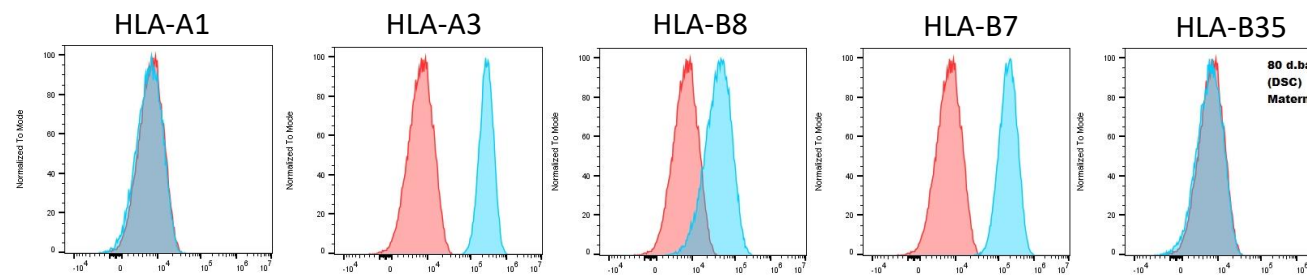

# Supplementary Figure 3b

**QG1, EVT d7**  
A1, A68(28), B8, B44(12)

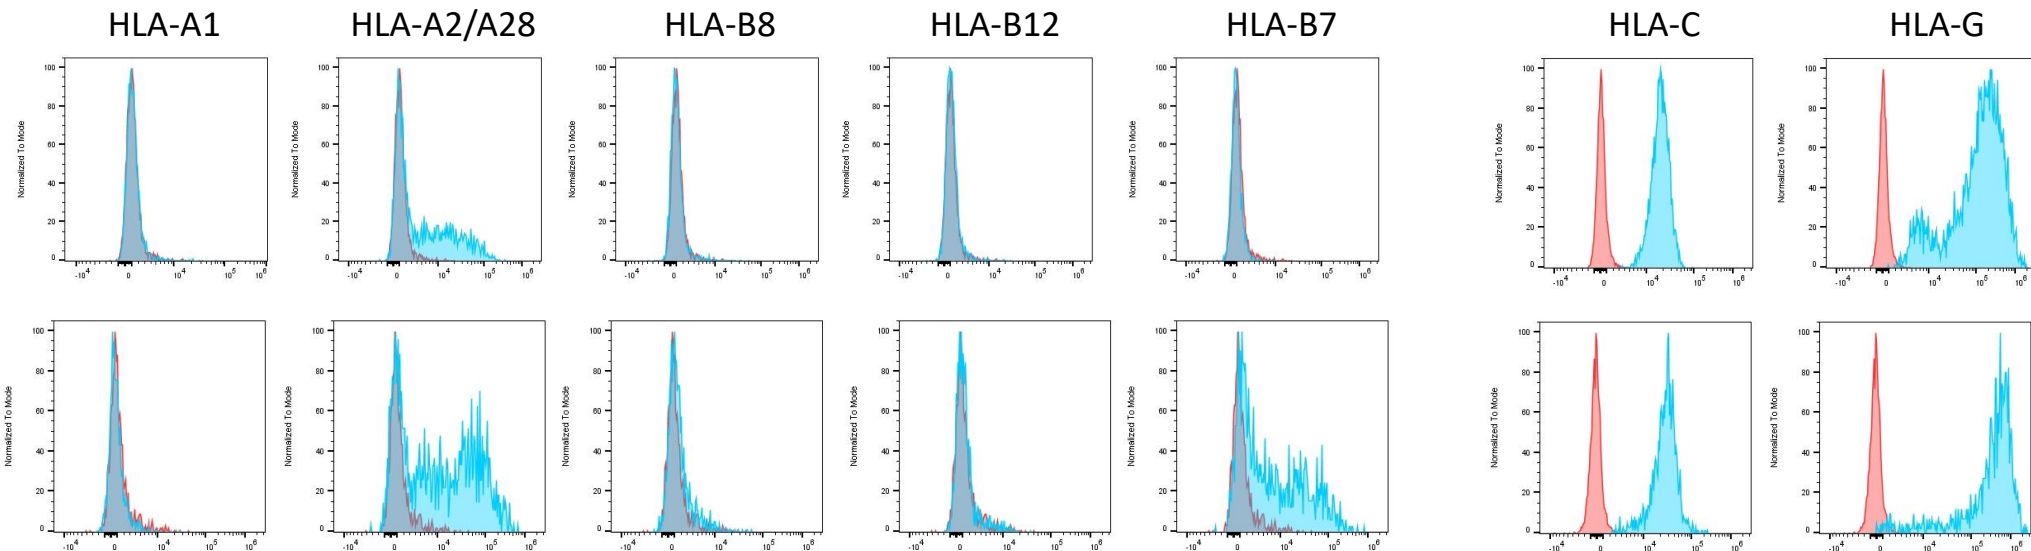

**QH1, EVT d7**  
A2, B7

**RC2, CTB**  
A3, B44(12), B56(22)

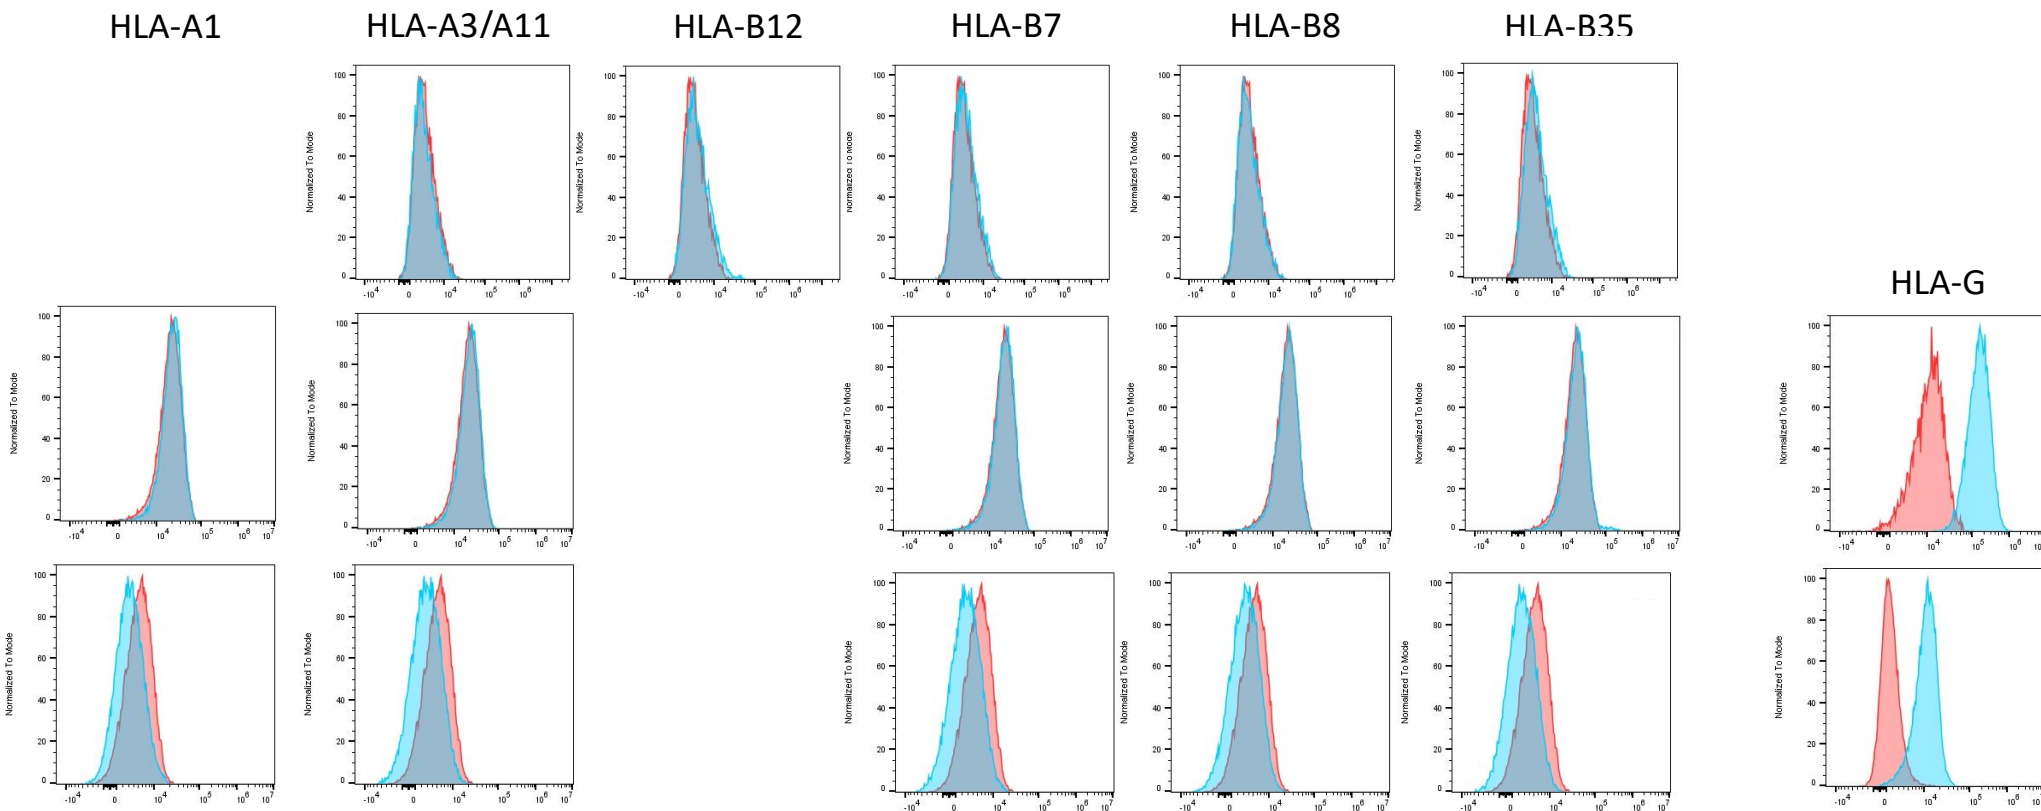

**JEG-3**  
A1, A11, B8, B35

**JAR**  
A3, A30(19), B7, B47
