# Supplementary material for: Primary Trophoblast Cultures: Characterization of HLA Profiles and Immune Cell Interactions
Source: PubMed Central journal article supplement (PMC9136060; doi:10.3389/fimmu.2022.814019), 2022-05-13
Supplement: DataSheet_2.pdf [file DataSheet_2.pdf]

### Supplementary Table 1

|               | HLA-A        | HLA-B        |
|---------------|--------------|--------------|
| Mat. Blood #1 | 02:01        | 07:02; 45:01 |
| Mat. Blood #2 | 01:01; 02:01 | 08:01; 44:02 |
| Mat. Blood #3 | 03:01; 68:01 | 07:02; 44:02 |
| Mat. Blood #4 | 03:01; 32:01 | 07:02        |
| QG1           | 01:01; 68:01 | 08:01; 44:02 |
| QH1           | 02:01        | 07:02        |
| RC2           | 03:01        | 44:02; 56:01 |
| JEG-3         | 01:01; 11:01 | 08:13; 35:01 |
| JAR           | 03:01; 30:02 | 07:02; 47:01 |
